# Supplementary material
Source: PubMed Central journal article supplement (PMC3172320)
Supplement: NIHMS318729-supplement-Supporting_information.pdf [file NIHMS318729-supplement-Supporting_information.pdf]

## Supporting Information

**Significant Enhancement of Docking Sensitivity using Implicit Ligand Sampling**

Markus A. Lill, Mengang Xu

Table S1. High-affinity ligands specific for human (hDHFR), *Pneumocystis carinii* (pcDHFR), and *Candida albicans* (caDHFR) dihydrofolate reductase. Ligand names and scaffold types are consistent with those in Bowman et al. <sup>1</sup>

| pcDHFR   |              | hDHFR    |                   | caDHFR   |            |
|----------|--------------|----------|-------------------|----------|------------|
| Scaffold | Name         | Scaffold | Name              | Scaffold | Name       |
| D        | Methotrexate | D        | AMT               | N        | HH-133     |
| D        | 029630       | D        | 8                 | N        | HH-136     |
| D        | 098579       | D        | 9                 | O        | 8a         |
| D        | 098580       | D        | 10                | O        | 8b         |
| D        | 107146       | D        | 6                 | O        | 8d         |
| D        | 136735       | F        | 1                 | O        | 8f         |
| D        | 136736       | F        | 5                 | O        | 8g         |
| D        | 144698       | F        | 16                | O        | 8h         |
| D        | 152737       | F        | 17                | O        | 8k         |
| D        | 169531       | F        | 36                | O        | 8l         |
| E        | 174121       | F        | 105952            | O        | 8m         |
| F        | 122870, 19   | F        | 13                | O        | 8r         |
| F        | 129516, 22   | F        | 14                | O        | 8s         |
| F        | 132483       | F        | 15                | O        | 8t         |
| F        | 184692       | F        | 2                 | O        | 8u         |
| F        | 15           | K        | 5-Me-5-dAMT       | O        | 8v         |
| J        | 21           | K        | 5-Me-5-dMTX       | O        | 8x         |
| K        | 21           | K        | 5-Me-10-Et-5-dAMT | O        | 13d        |
| K        | 13n, 2       | K        | 5-dAMT            |          | Ro 17-3279 |
| K        | 13q, 43      | K        | 11                |          |            |

Table S2. Results of multi-linear regression analysis for ligands BMZ, DA2K, C24 and G3X correlating  $d_{ij}^{<}$  and  $d_{ij}^{>}$  with the RMSD deviation from the native ligand conformation.

| Ligand: BMZ             | $r^2=0.42$              | $c_0=-8.02$                  |                |
|-------------------------|-------------------------|------------------------------|----------------|
| Atom i                  | Atom j                  | $d_{ij}^{>}$ or $d_{ij}^{<}$ | $c_{ij}^{>/<}$ |
| His57, C $_{\gamma}$    | Glu192, C $_{\delta}$   | >                            | 0.16           |
| Tyr60A, C $_{\alpha}$   | Trp60D, C $_{\alpha}$   | <                            | -2.12          |
| Tyr60A, C $_{\alpha}$   | Ser195, C $_{\alpha}$   | <                            | 0.65           |
| Tyr60A, C $_{\xi}$      | Asp189, C $_{\gamma}$   | <                            | -0.51          |
| Trp60D, C $_{\alpha}$   | Ile174, C $_{\gamma 1}$ | >                            | 0.14           |
| Trp60D, C $_{\delta 2}$ | Glu192, C $_{\alpha}$   | >                            | 0.10           |
| Lys60F, C $_{\alpha}$   | Ser195, C $_{\alpha}$   | >                            | -0.29          |
| Ile174, C $_{\alpha}$   | Glu192, C $_{\delta}$   | <                            | 0.11           |
| Ile174, C $_{\gamma 1}$ | Cys191, C $_{\alpha}$   | >                            | -0.23          |
| Ile174, C $_{\gamma 1}$ | Val213, C $_{\beta}$    | <                            | -0.50          |
| Ile174, C $_{\gamma 1}$ | Gly219, C $_{\alpha}$   | >                            | 0.39           |
| Asp189, C $_{\alpha}$   | Val213, C $_{\alpha}$   | <                            | 1.79           |
| Asp189, C $_{\gamma}$   | Ser195, C $_{\alpha}$   | <                            | 0.46           |
| Asp189, C $_{\gamma}$   | Trp215, C $_{\alpha}$   | >                            | 0.42           |
| Ala190, C $_{\alpha}$   | Trp215, C $_{\delta 2}$ | >                            | -0.60          |
| Ala190, C $_{\alpha}$   | Gly216, C $_{\alpha}$   | <                            | -0.82          |
| Cys191, S $_{\gamma}$   | Trp215, C $_{\delta 2}$ | <                            | -0.68          |
| Glu192, C $_{\delta}$   | Val213, C $_{\alpha}$   | <                            | -0.23          |
| Glu192, C $_{\delta}$   | Gly216, C $_{\alpha}$   | >                            | -0.20          |
| Glu192, C $_{\delta}$   | Gly219, C $_{\alpha}$   | >                            | 0.25           |
| Ser195, O $_{\gamma}$   | Gly219, C $_{\alpha}$   | <                            | -0.62          |
| Val213, C $_{\alpha}$   | Gly226, C $_{\alpha}$   | <                            | -0.57          |
| Gly216, C $_{\alpha}$   | Gly219, C $_{\alpha}$   | <                            | -0.71          |

| Ligand: DA2K          | $r^2=0.75$              | $c_0=-1.39$                  |                |
|-----------------------|-------------------------|------------------------------|----------------|
| Atom i                | Atom j                  | $d_{ij}^{>}$ or $d_{ij}^{<}$ | $c_{ij}^{>/<}$ |
| Tyr60A, C $_{\alpha}$ | Trp60D, C $_{\delta 2}$ | <                            | 0.92           |
| Trp60D, C $_{\alpha}$ | Glu192, C $_{\delta}$   | <                            | -0.43          |

|                         |                         |   |       |
|-------------------------|-------------------------|---|-------|
| Trp60D, C <sub>δ2</sub> | Val213, C <sub>α</sub>  | < | -1.05 |
| Leu99, C <sub>α</sub>   | Gly216, C <sub>α</sub>  | > | -1.54 |
| ILE174, C <sub>α</sub>  | Ala190, C <sub>α</sub>  | > | -1.14 |
| Asp189, C <sub>γ</sub>  | Gly216, C <sub>α</sub>  | < | -2.08 |
| Cys191, C <sub>α</sub>  | Glu192, C <sub>δ</sub>  | > | 0.86  |
| Glu192, C <sub>δ</sub>  | Ser195, C <sub>α</sub>  | < | -0.75 |
| Glu192, C <sub>δ</sub>  | Ser195, C <sub>α</sub>  | > | 0.85  |
| Glu192, C <sub>δ</sub>  | Trp215, C <sub>δ2</sub> | < | -1.18 |
| Ser195, C <sub>α</sub>  | Gly226, C <sub>α</sub>  | > | 0.75  |

| Ligand: C24            | r <sup>2</sup> =0.72    | c <sub>0</sub> =-9.51                                              |                                      |
|------------------------|-------------------------|--------------------------------------------------------------------|--------------------------------------|
| Atom i                 | Atom j                  | d <sub>ij</sub> <sup>&gt;</sup> or d <sub>ij</sub> <sup>&lt;</sup> | c <sub>ij</sub> <sup>&gt;/&lt;</sup> |
| Lys60F, C <sub>α</sub> | Glu192, C <sub>δ</sub>  | >                                                                  | 0.19                                 |
| Leu99, C <sub>α</sub>  | Gly219, C <sub>α</sub>  | <                                                                  | -0.31                                |
| Asp189, C <sub>γ</sub> | Ser195, C <sub>α</sub>  | >                                                                  | 0.46                                 |
| Ala190, C <sub>β</sub> | Val213, C <sub>α</sub>  | >                                                                  | -0.92                                |
| Cys191, S <sub>γ</sub> | Ser195, C <sub>α</sub>  | >                                                                  | 0.44                                 |
| Glu192, C <sub>δ</sub> | Ser195, C <sub>α</sub>  | <                                                                  | -0.48                                |
| Glu192, C <sub>δ</sub> | Gly219, C <sub>α</sub>  | >                                                                  | 0.50                                 |
| Ser195, O <sub>γ</sub> | Trp215, C <sub>δ2</sub> | <                                                                  | -0.29                                |
| Val213, C <sub>α</sub> | Gly219, C <sub>α</sub>  | <                                                                  | -0.80                                |

| Ligand: G3X            | r <sup>2</sup> =0.50   | c <sub>0</sub> =-10.11                                             |                                      |
|------------------------|------------------------|--------------------------------------------------------------------|--------------------------------------|
| Atom i                 | Atom j                 | d <sub>ij</sub> <sup>&gt;</sup> or d <sub>ij</sub> <sup>&lt;</sup> | c <sub>ij</sub> <sup>&gt;/&lt;</sup> |
| Asp72, C <sub>α</sub>  | Phe331, C <sub>α</sub> | <                                                                  | 0.44                                 |
| Asp72, C <sub>γ</sub>  | Phe331, C <sub>α</sub> | <                                                                  | -0.91                                |
| Asp72, C <sub>γ</sub>  | Tyr334, C <sub>ξ</sub> | >                                                                  | 0.17                                 |
| Trp84, C <sub>α</sub>  | Tyr121, C <sub>ξ</sub> | <                                                                  | -0.31                                |
| Trp84, C <sub>α</sub>  | Phe331, C <sub>α</sub> | <                                                                  | -1.14                                |
| Trp84, C <sub>δ2</sub> | Gly441, C <sub>α</sub> | >                                                                  | 0.89                                 |
| Gly119, C <sub>α</sub> | Tyr130, C <sub>α</sub> | >                                                                  | 1.25                                 |
| Gly119, C <sub>α</sub> | Tyr130, C <sub>ξ</sub> | >                                                                  | -0.69                                |
| Gly119, C <sub>α</sub> | Phe288, C <sub>α</sub> | >                                                                  | 0.84                                 |

|                        |                        |   |       |
|------------------------|------------------------|---|-------|
| Tyr121, C <sub>α</sub> | Glu199, C <sub>α</sub> | < | -0.92 |
| Tyr121, C <sub>α</sub> | Glu199, C <sub>α</sub> | > | -0.56 |
| Tyr121, C <sub>α</sub> | Phe290, C <sub>γ</sub> | < | -1.45 |
| Tyr121, C <sub>α</sub> | Phe330, C <sub>α</sub> | < | 0.62  |
| Tyr121, C <sub>ξ</sub> | Phe288, C <sub>α</sub> | < | 0.85  |
| Tyr121, C <sub>ξ</sub> | Phe330, C <sub>γ</sub> | < | -0.53 |
| Ser122, C <sub>α</sub> | Phe331, C <sub>α</sub> | < | 1.05  |
| Ser122, O <sub>γ</sub> | Glu199, C <sub>α</sub> | < | 1.12  |
| Tyr130, C <sub>α</sub> | Glu199, C <sub>α</sub> | < | -0.80 |
| Tyr130, C <sub>α</sub> | Glu199, C <sub>δ</sub> | > | -0.46 |
| Tyr130, C <sub>ξ</sub> | Ser200, O <sub>γ</sub> | > | -0.21 |
| Ser200, O <sub>γ</sub> | His440, C <sub>γ</sub> | > | 0.34  |
| Phe288, C <sub>α</sub> | Phe290, C <sub>α</sub> | > | -1.54 |
| Phe288, C <sub>α</sub> | Phe331, C <sub>γ</sub> | < | -2.47 |
| Phe290, C <sub>γ</sub> | Tyr334, C <sub>ξ</sub> | < | -0.11 |
| Phe330, C <sub>γ</sub> | Tyr334, C <sub>α</sub> | < | -0.27 |
| Tyr334, C <sub>ξ</sub> | His440, C <sub>γ</sub> | < | -0.23 |

Table S3. Results of multi-linear regression analysis for ligands BMZ, DA2K, C24 and G3X correlating  $d_{ij}^{<}$  and  $d_{ij}^{>}$  with scores of binding poses.

| Ligand: BMZ             | $r^2=0.65$              | $c_0=-8.03$                  |                |
|-------------------------|-------------------------|------------------------------|----------------|
| Atom i                  | Atom j                  | $d_{ij}^{>}$ or $d_{ij}^{<}$ | $c_{ij}^{>/<}$ |
| His57, C $_{\alpha}$    | Tyr60A, C $_{\xi}$      | >                            | 0.43           |
| His57, C $_{\alpha}$    | Trp215, C $_{\delta 2}$ | <                            | -0.88          |
| His57, C $_{\gamma}$    | Trp60D, C $_{\delta 2}$ | >                            | -0.20          |
| His57, C $_{\gamma}$    | Glu192, C $_{\delta}$   | <                            | -1.94          |
| Tyr60A, C $_{\xi}$      | Ala190, C $_{\beta}$    | >                            | -0.53          |
| Tyr60A, C $_{\xi}$      | Cys191, C $_{\alpha}$   | >                            | 0.38           |
| Tyr60A, C $_{\xi}$      | Val213, C $_{\alpha}$   | <                            | -0.37          |
| Trp60D, C $_{\delta 2}$ | Ser195, C $_{\alpha}$   | >                            | 0.19           |
| Lys60F, C $_{\alpha}$   | Asp189, C $_{\gamma}$   | >                            | 0.21           |
| Lys60F, C $_{\alpha}$   | Glu192, C $_{\delta}$   | >                            | 0.10           |
| Lys60F, C $_{\alpha}$   | Gly226, C $_{\alpha}$   | >                            | -0.22          |
| Leu99, C $_{\alpha}$    | Asp189, C $_{\alpha}$   | >                            | 0.52           |
| ILE174, C $_{\alpha}$   | Glu192, C $_{\delta}$   | <                            | 0.26           |
| ILE174, C $_{\gamma 1}$ | Val213, C $_{\beta}$    | <                            | -0.49          |
| Asp189, C $_{\alpha}$   | Ala190, C $_{\beta}$    | <                            | 1.07           |
| Asp189, C $_{\gamma}$   | Val213, C $_{\beta}$    | <                            | 1.25           |
| Ala190, C $_{\alpha}$   | Ser195, C $_{\alpha}$   | <                            | -0.83          |
| Ala190, C $_{\alpha}$   | Gly216, C $_{\alpha}$   | <                            | -1.00          |
| Ala190, C $_{\beta}$    | Cys191, C $_{\alpha}$   | >                            | 1.53           |
| Ala190, C $_{\beta}$    | Cys191, S $_{\gamma}$   | >                            | 2.99           |
| Cys191, C $_{\alpha}$   | Val213, C $_{\beta}$    | <                            | -1.63          |
| Cys191, S $_{\gamma}$   | Glu192, C $_{\alpha}$   | <                            | -1.25          |
| Cys191, S $_{\gamma}$   | Ser195, O $_{\gamma}$   | <                            | 0.56           |
| Cys191, S $_{\gamma}$   | Trp215, C $_{\alpha}$   | >                            | -0.74          |
| Glu192, C $_{\alpha}$   | Gly219, C $_{\alpha}$   | >                            | 0.34           |
| Glu192, C $_{\delta}$   | Ser195, O $_{\gamma}$   | <                            | 0.62           |
| Ser195, O $_{\gamma}$   | Gly219, C $_{\alpha}$   | <                            | -0.96          |
| Ser195, O $_{\gamma}$   | Gly226, C $_{\alpha}$   | <                            | -0.65          |

|                         |                         |   |       |
|-------------------------|-------------------------|---|-------|
| Val213, C <sub>α</sub>  | Trp215, C <sub>δ2</sub> | < | -0.76 |
| Val213, C <sub>β</sub>  | Gly216, C <sub>α</sub>  | < | -0.69 |
| Trp215, C <sub>δ2</sub> | Gly216, C <sub>α</sub>  | > | 0.52  |
| Gly219, C <sub>α</sub>  | Gly226, C <sub>α</sub>  | < | -0.40 |

|                         |                        |                                                                    |                                      |
|-------------------------|------------------------|--------------------------------------------------------------------|--------------------------------------|
| Ligand: DA2K            | r <sup>2</sup> =0.75   | c <sub>0</sub> =-9.16                                              |                                      |
| Atom i                  | Atom j                 | d <sub>ij</sub> <sup>&gt;</sup> or d <sub>ij</sub> <sup>&lt;</sup> | c <sub>ij</sub> <sup>&gt;/&lt;</sup> |
| His57, C <sub>α</sub>   | Glu192, C <sub>α</sub> | >                                                                  | 0.61                                 |
| Trp60D, C <sub>δ2</sub> | Asp189, C <sub>α</sub> | >                                                                  | 0.26                                 |
| Lys60F, C <sub>α</sub>  | Val213, C <sub>β</sub> | <                                                                  | -0.83                                |
| Asp189, C <sub>γ</sub>  | Val213, C <sub>α</sub> | <                                                                  | -2.53                                |
| Glu192, C <sub>α</sub>  | Gly219, C <sub>α</sub> | >                                                                  | 0.83                                 |

|                        |                         |                                                                    |                                      |
|------------------------|-------------------------|--------------------------------------------------------------------|--------------------------------------|
| Ligand: C24            | r <sup>2</sup> =0.77    | c <sub>0</sub> =-9.67                                              |                                      |
| Atom i                 | Atom j                  | d <sub>ij</sub> <sup>&gt;</sup> or d <sub>ij</sub> <sup>&lt;</sup> | c <sub>ij</sub> <sup>&gt;/&lt;</sup> |
| His57, C <sub>α</sub>  | Lys60F, C <sub>ε</sub>  | >                                                                  | 0.18                                 |
| Trp60D, C <sub>α</sub> | Leu99, C <sub>α</sub>   | <                                                                  | -1.76                                |
| Trp60D, C <sub>α</sub> | Leu99, C <sub>γ</sub>   | >                                                                  | -0.57                                |
| Trp60D, C <sub>α</sub> | Ile174, C <sub>γ1</sub> | >                                                                  | 0.39                                 |
| Trp60D, C <sub>α</sub> | Gly219, C <sub>α</sub>  | >                                                                  | 0.36                                 |
| Leu99, C <sub>α</sub>  | Asp189, C <sub>γ</sub>  | >                                                                  | 1.07                                 |
| Ala190, C <sub>α</sub> | Glu192, C <sub>δ</sub>  | <                                                                  | -1.55                                |
| Ala190, C <sub>β</sub> | Gly219, C <sub>α</sub>  | >                                                                  | 1.08                                 |
| Cys191, C <sub>α</sub> | Glu192, C <sub>δ</sub>  | <                                                                  | 1.23                                 |

|                       |                        |                                                                    |                                      |
|-----------------------|------------------------|--------------------------------------------------------------------|--------------------------------------|
| Ligand: G3X           | r <sup>2</sup> =0.76   | c <sub>0</sub> =-10.63                                             |                                      |
| Atom i                | Atom j                 | d <sub>ij</sub> <sup>&gt;</sup> or d <sub>ij</sub> <sup>&lt;</sup> | c <sub>ij</sub> <sup>&gt;/&lt;</sup> |
| Asp72, C <sub>α</sub> | Asp72, C <sub>γ</sub>  | <                                                                  | 5.79                                 |
| Asp72, C <sub>α</sub> | Ser122, C <sub>α</sub> | <                                                                  | 0.43                                 |
| Asp72, C <sub>γ</sub> | Gly119, C <sub>α</sub> | >                                                                  | 0.27                                 |
| Asp72, C <sub>γ</sub> | Tyr121, C <sub>ξ</sub> | <                                                                  | -0.55                                |
| Trp84, C <sub>α</sub> | Trp84, C <sub>δ2</sub> | <                                                                  | 1.64                                 |
| Trp84, C <sub>α</sub> | Gly119, C <sub>α</sub> | >                                                                  | 0.34                                 |

|                        |                        |   |       |
|------------------------|------------------------|---|-------|
| Trp84, C <sub>α</sub>  | Tyr121, C <sub>ξ</sub> | > | -1.10 |
| Trp84, C <sub>α</sub>  | Tyr130, C <sub>ξ</sub> | > | 0.49  |
| Trp84, C <sub>α</sub>  | Phe290, C <sub>α</sub> | > | 1.15  |
| Trp84, C <sub>α</sub>  | Phe331, C <sub>α</sub> | < | -0.98 |
| Trp84, C <sub>δ2</sub> | Glu199, C <sub>δ</sub> | > | -0.75 |
| Gly119, C <sub>α</sub> | Glu199, C <sub>δ</sub> | < | -0.48 |
| Tyr121, C <sub>α</sub> | Phe288, C <sub>α</sub> | < | 0.88  |
| Tyr121, C <sub>α</sub> | Phe330, C <sub>γ</sub> | < | -0.50 |
| Tyr121, C <sub>α</sub> | Trp334, C <sub>α</sub> | < | -0.34 |
| Tyr121, C <sub>α</sub> | His440, C <sub>α</sub> | < | 0.50  |
| Tyr121, C <sub>ξ</sub> | Ser200, O <sub>γ</sub> | < | -0.45 |
| Tyr121, C <sub>ξ</sub> | His440, C <sub>γ</sub> | < | -0.47 |
| Tyr121, C <sub>ξ</sub> | Gly441, C <sub>α</sub> | > | -0.74 |
| Ser122, C <sub>α</sub> | Tyr130, C <sub>α</sub> | > | 0.30  |
| Ser122, O <sub>γ</sub> | Phe331, C <sub>α</sub> | > | 0.47  |
| Tyr130, C <sub>α</sub> | Phe290, C <sub>γ</sub> | > | -0.65 |
| Glu199, C <sub>α</sub> | Phe290, C <sub>α</sub> | < | -0.60 |
| Glu199, C <sub>α</sub> | Tyr334, C <sub>α</sub> | < | -0.40 |
| Ser200, O <sub>γ</sub> | Phe330, C <sub>α</sub> | < | -1.82 |
| Phe288, C <sub>γ</sub> | Phe331, C <sub>α</sub> | < | 0.66  |
| Phe290, C <sub>α</sub> | Phe290, C <sub>γ</sub> | > | 7.31  |
| Phe330, C <sub>α</sub> | Tyr334, C <sub>α</sub> | < | -1.39 |
| Phe330, C <sub>γ</sub> | Tyr334, C <sub>ξ</sub> | > | 0.52  |
| Phe330, C <sub>γ</sub> | Gly441, C <sub>α</sub> | > | 0.37  |

Table S4. Predicted versus experimental binding affinity for 14 compounds binding to thrombin.

| Ligand name<br>or PDB code | Experimental $\Delta G$<br>[kcal/mol] | Predicted $\Delta G$<br>Ligand model<br>[kcal/mol] | Deviation<br>[kcal/mol] | Predicted $\Delta G$<br>Long apo<br>[kcal/mol] | Deviation<br>[kcal/mol] |
|----------------------------|---------------------------------------|----------------------------------------------------|-------------------------|------------------------------------------------|-------------------------|
| lypg                       | -10.90                                | -12.46                                             | 1.56                    | -12.75                                         | 1.86                    |
| lype                       | -11.04                                | -10.18                                             | 0.86                    | -8.71                                          | 2.33                    |
| lypj                       | -9.58                                 | -9.94                                              | 0.35                    | -8.40                                          | 1.18                    |
| loyt                       | -9.87                                 | -8.34                                              | 1.53                    | -9.31                                          | 0.55                    |
| 2cf8                       | -11.04                                | -11.35                                             | 0.31                    | -14.05                                         | 3.01                    |
| 2cn0                       | -10.44                                | -11.41                                             | 0.97                    | -11.07                                         | 0.63                    |
| 1vzq                       | -10.16                                | -10.25                                             | 0.09                    | -7.79                                          | 2.37                    |
| rac-8 from <sup>2</sup>    | -7.10                                 | -6.19                                              | 0.91                    | -5.20                                          | 1.90                    |
| rac-13a from <sup>3</sup>  | -7.77                                 | -9.32                                              | 1.56                    | -9.24                                          | 1.48                    |
| rac-16 from <sup>4</sup>   | -6.86                                 | -5.82                                              | 1.04                    | -7.87                                          | 1.01                    |
| rac-5 from <sup>5</sup>    | -6.31                                 | -7.85                                              | 1.54                    | -7.26                                          | 0.95                    |
| rac-8 from <sup>5</sup>    | -8.25                                 | -6.31                                              | 1.93                    | -6.57                                          | 1.67                    |
| rac-9 from <sup>5</sup>    | -11.33                                | -10.74                                             | 0.59                    | -11.38                                         | 0.05                    |
| (+)-7 from <sup>6</sup>    | -8.65                                 | -9.14                                              | 0.49                    | -9.70                                          | 1.05                    |

#### Reference List

1. Bowman, A. L.; Lerner, M. G.; Carlson, H. A. Protein flexibility and species specificity in structure-based drug discovery: dihydrofolate reductase as a test system. *J. Am. Chem. Soc.* **2007**, *129*, 3634-3640.
2. Obst, U.; Banner, D. W.; Weber, L.; Diederich, F. Molecular recognition at the thrombin active site: Structure-based design and synthesis of potent and selective thrombin inhibitors and the x-ray crystal structures of two thrombin-inhibitor complexes. *Chemistry & Biology* **1997**, *4*, 287-295.
3. Obst, U.; Banner, D. W.; Weber, L.; Diederich, F. Molecular recognition at the thrombin active site: Structure-based design and synthesis of potent and selective thrombin inhibitors and the x-ray crystal structures of two thrombin-inhibitor complexes. *Chemistry & Biology* **1997**, *4*, 287-295.



4. Obst, U.; Banner, D. W.; Weber, L.; Diederich, F. Molecular recognition at the thrombin active site: Structure-based design and synthesis of potent and selective thrombin inhibitors and the x-ray crystal structures of two thrombin-inhibitor complexes. *Chemistry & Biology* **1997**, *4*, 287-295.
5. Schweizer, E.; Hoffmann-Roder, A.; Olsen, J. A.; Seiler, P.; Obst-Sander, U.; Wagner, B.; Kansy, M.; Banner, D. W.; Diederich, F. Multipolar interactions in the D pocket of thrombin: large differences between tricyclic imide and lactam inhibitors. *Organic & Biomolecular Chemistry* **2006**, *4*, 2364-2375.
6. Schweizer, E.; Hoffmann-Roder, A.; Scharer, K.; Olsen, J. A.; Fah, C.; Seiler, P.; Obst-Sander, U.; Wagner, B.; Kansy, M.; Diederich, F. A fluorine scan at the catalytic center of thrombin: C-F, C-OH, and C-OMe bioisosterism and fluorine effects on pK(a) and log(D) values. *Chemmedchem* **2006**, *1*, 611-621.
